# Supplementary material for: Phase-selective synthesis of bornite nanoparticles
Source: Royal Society of Chemistry journal article supplement (doi:10.1039/c1jm13677a), 2011-01-01
Supplement: c1jm13677a.pdf [file c1jm13677a.pdf]

## Phase-Selective Synthesis of Bornite Nanoparticles

Alex M. Wiltrout, Nathaniel J. Freymeyer, Tony Machani, Daniel P. Rossi, and Katherine E. Plass<sup>a\*</sup>

### Supporting Information:

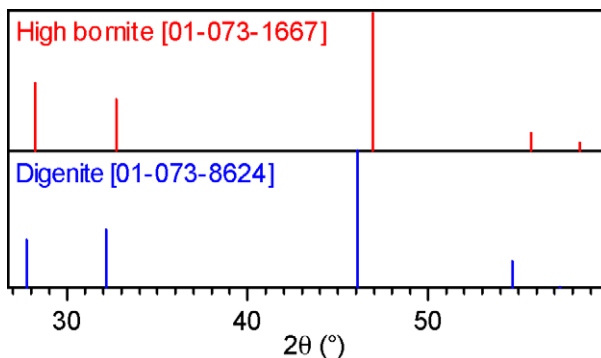

Figure S1. ICDD database PXRD patterns of high bornite [01-073-1667] and digenite [01-073-8624].

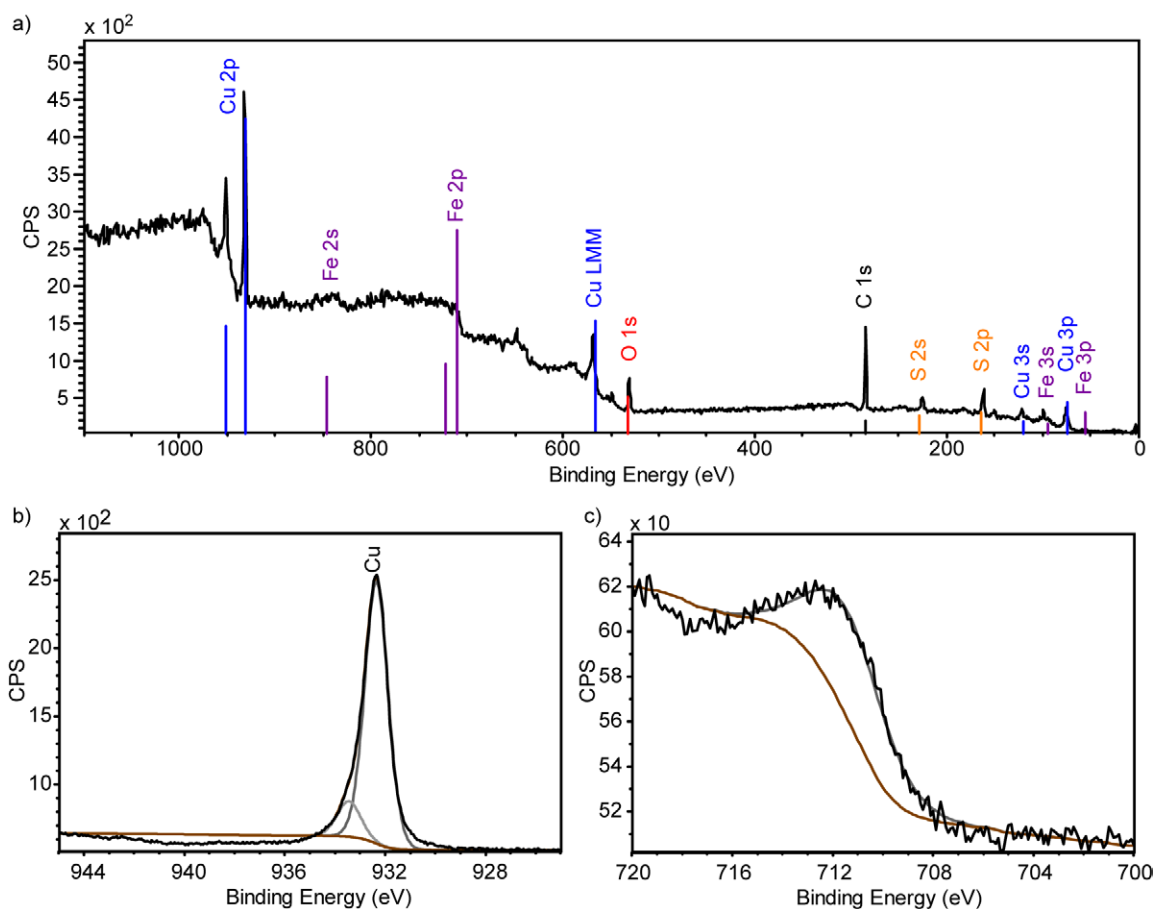

Figure S2. X-ray photoelectron spectra of bornite nanoparticles. a) Survey scan shows the presence of Fe, Cu, S, and C as expected for 1-dodecanethiol-coated bornite nanoparticles. O is present as well, suggesting that oxidation of the surface may have occurred to some degree. b) The Cu 2p 3/2 region shows primarily a peak centered at 932.3 eV, which is expected of  $\text{Cu}^+$  species. A shoulder peak reveals the presence of a small amount of  $\text{Cu}^{2+}$ . c) The Fe 2p 3/2 region shows a broad peak that extends from 708 eV to 716 eV, encompassing the range of values observed for the Fe ion in FeS, Fe<sub>2</sub>O<sub>3</sub>, and CuFeS<sub>2</sub>. (Wagner, C. D.; Naumkin, A. V.; Kraut-Vass, A.; Allison, J. W.; Powell, C. J.; Rumble, J. R., NIST Standard Reference Database 20, Version 3.5. 2003.)

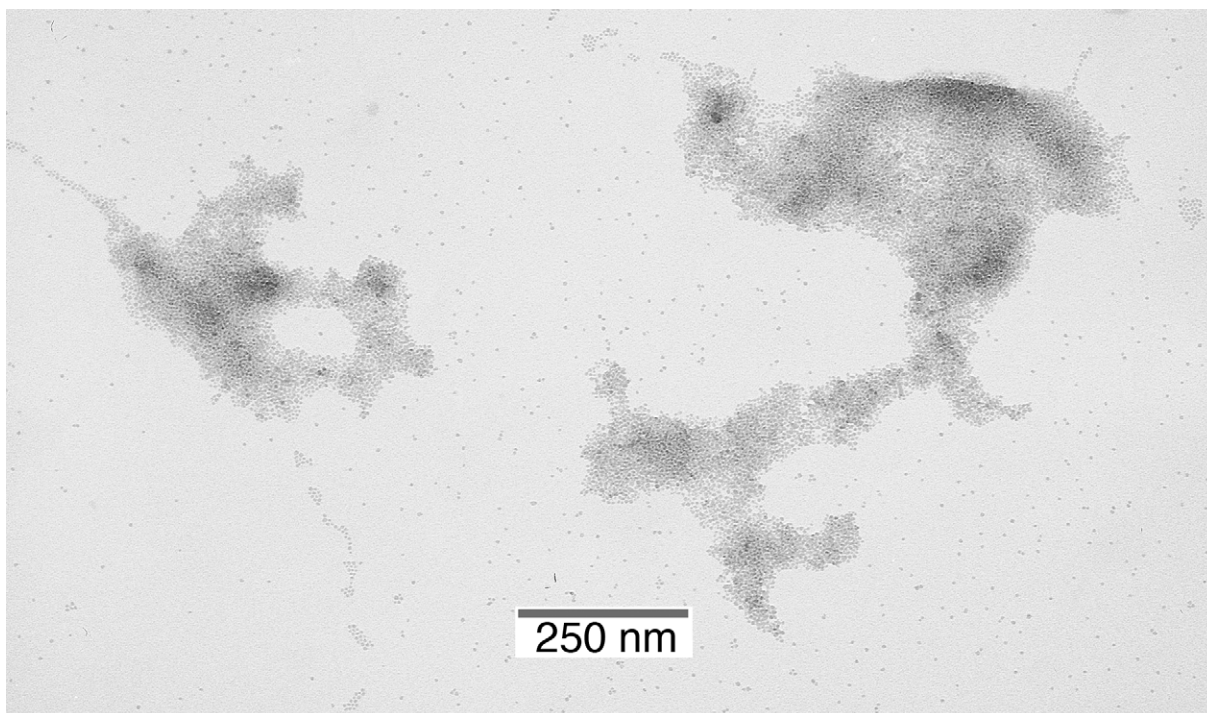

**Figure S3.** TEM image (50,000x) of high bornite nanoparticles obtained at 180 °C.

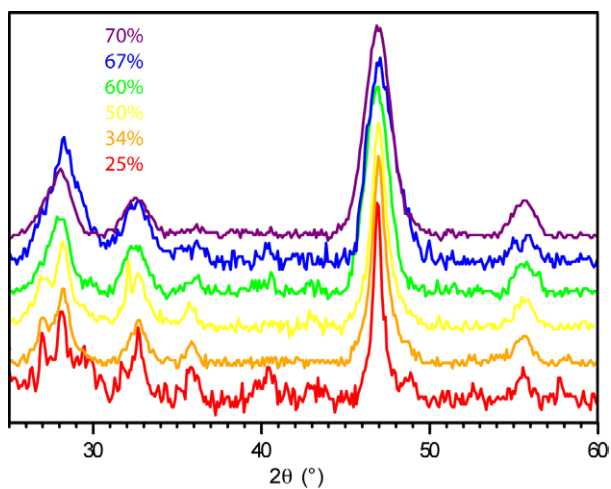

**Figure S4.** PXRD patterns of nanoparticles obtained from 80 mM of S, 50 mM Cu(II)(acac)<sub>2</sub>, and 10 mM Fe(III)(acac)<sub>3</sub> in solutions of various 1-dodecanethiol/oleic acid ratios. The percentage of 1-dodecanethiol is shown in the legend. The peak at 47° 2θ increases in width with the amount of 1-dodecanethiol, independently from the particle size (at 34% 1-dodecanethiol the particle diameter was  $9.4 \pm 2.7$  nm while at 65% 1-dodecanethiol the particle diameter was  $9.3 \pm 3.2$  nm).

**Table S1.** Mass percent measurements used for calculation of stoichiometries.

|                    | low bornite nanoparticles |           |           | high bornite nanoparticles |           |           |
|--------------------|---------------------------|-----------|-----------|----------------------------|-----------|-----------|
|                    | S mass %                  | Fe mass % | Cu mass % | S mass %                   | Fe mass % | Cu mass % |
| 1                  | 15.43                     | 10.13     | 74.45     | 29.10                      | 6.70      | 64.20     |
| 2                  | 28.3                      | 7.80      | 63.91     | 27.77                      | 7.20      | 65.03     |
| 3                  | 22.26                     | 8.29      | 69.44     | 26.19                      | 7.41      | 66.41     |
| 4                  | 33.06                     | 8.82      | 58.12     | 30.74                      | 6.48      | 62.78     |
| 5                  | 30.36                     | 8.74      | 60.89     | 25.95                      | 6.74      | 67.31     |
| 6                  | 29.57                     | 8.55      | 61.88     | 29.78                      | 7.38      | 62.84     |
| 7                  | 33.06                     | 8.82      | 58.12     | 28.61                      | 8.03      | 63.36     |
| 8                  | 30.36                     | 8.74      | 60.89     | 24.41                      | 7.71      | 67.88     |
| 9                  | 29.57                     | 8.55      | 61.88     |                            |           |           |
| Average            | 29.57                     | 8.54      | 61.89     | 27.82                      | 7.21      | 64.98     |
| Standard Deviation | 3.39                      | 0.35      | 3.62      | 2.15                       | 0.54      | 2.02      |

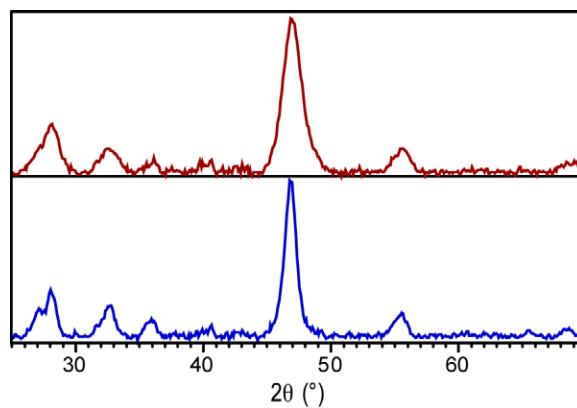

**Figure S5.** PXRD patterns of low bornite particles obtained after 6 hours with 50 mM (top) and 80 mM (bottom) of S, 50 mM Cu(II)(acac)<sub>2</sub>, and 10 mM Fe(III)(acac)<sub>3</sub>.

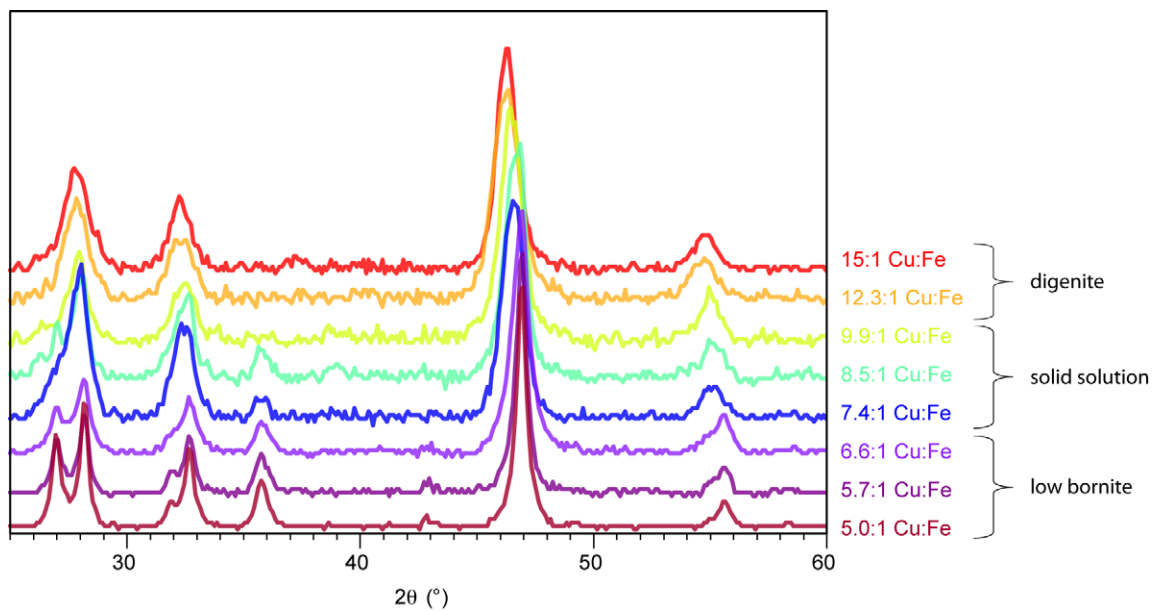

**Figure S6.** PXRD patterns of nanoparticles obtained with 80 mM of S and 10 mM  $\text{Fe(III)(acac)}_3$ , and varying amounts of  $\text{Cu(II)(acac)}_2$  in the mole ratios given above.
